# Supplementary material for: Determining the ultraviolet radiation dose experienced by aerosols using ultraviolet-sensitive dyes
Source: Copernicus journal article supplement (doi:10.5194/ar-2-77-2024), 2024-05-17
Supplement: Supplementary file 1 [file ar-2-77-2024-supplement.pdf]

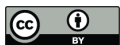

*Supplement of*

## **Determining the ultraviolet radiation dose experienced by aerosols using ultraviolet-sensitive dyes**

**Qingqing Fu and Frank Einar Kruis**

*Correspondence to:* Frank Einar Kruis ([einar.kruis@uni-due.de](mailto:einar.kruis@uni-due.de))

The copyright of individual parts of the supplement might differ from the article licence.

## S1. Estimating the cutoff Stokes diameter of the designed impactor.

In an impactor, the parameter that governs collection efficiency is the Stokes number (Fuchs and Davies, 1989), which is defined as the ratio of the particle stopping distance at the average nozzle exit velocity  $U$  to the half the jet diameter  $D_j$ :

$$Stk = \frac{\tau U}{D_j/2} = \frac{\rho_p d_p^2 U C_c}{9\eta D_j} \quad (S1-1)$$

Where  $\rho_p$  = the particle density

$D_p$  = particle Stokes diameter

$C_c$  = Cunningham slip factor

$U$  = mean velocity in the jet

$\eta$  = gas viscosity

$D_j$  = jet diameter

The cutoff diameter  $d_{50}$  corresponds to a single Stokes number  $Stk_{50}$ , which gives 50% collection efficiency. According to equation (S1-1), the cutoff diameter in terms of the values of  $Stk_{50}$  can be expressed as:

$$d_{50} \sqrt{C_c} = \left[ \frac{9\eta D_j (Stk_{50})}{\rho_p U} \right]^{1/2} \quad (S1-2)$$

By writing the jet velocity  $U$  in equation S1-2 as the ration of the jet flow rate  $Q$  to the jet cross-sectional area. For a round jet impactor ( $Stk_{50} = 0.24$ , when the ratio of the jet-to-plate distance to the jet diameter exceeds 1.0)(Hinds, 1999), the equation (S1-2) can also be expressed as:

$$d_{50} \sqrt{C_c} = \left[ \frac{9\pi\eta D_j^3 (Stk_{50})}{4\rho_p Q} \right]^{1/2} \quad (S1-3)$$

The Cunningham slip factor is a function of particle diameter. To simplify the calculation, we applied the count median stokes diameter  $d_{CMD}$ , which determined by the ELPI (electrostatic low-pressure impactor) to estimate the Cunningham slip factor using the following equation (S1-4):

$$C_c(p, d_{CMD}) = 1 + \frac{2\lambda_g(p)}{d_{CMD}} \left( A_1 + A_2 \cdot \exp \left( -A_3 \cdot \frac{d_{CMD}}{2\lambda_g(p)} \right) \right) \quad (S1-4)$$

Where  $A_1, A_2, A_3$  are given by Rader (Rader, 1990) as  $A_1 = 1.207$ ,  $A_2 = 0.440$  and  $A_3 = 0.78$ .  $\lambda_g$  is the minimum free path length of gas molecules (nitrogen in this study) as function of impactor pressure  $p$ .

Table S1 summarizes the parameters used to determine the cutoff diameter for the impactor used in this work.

|                                     |                   |          |                                |
|-------------------------------------|-------------------|----------|--------------------------------|
| Particle density (DEHS)             | $\rho_p$          | 912      | $\text{kg}\cdot\text{m}^{-3}$  |
| Gas viscosity ( $\text{N}_2$ )      | $\eta$            | 1.78E-05 | $\text{Pa}\cdot\text{s}$       |
| Circular jet diameter               | $D_j$             | 2.0E-03  | m                              |
| Stokes number (circular jet)        | $Stk_{50}$        | 0.24     | -                              |
| Impactor pressure                   | $p$               | 0.22     | atm                            |
| Gas mean free path @1atm            | $\lambda_0$       | 67.4     | nm                             |
| Gas mean free path @impactor        | $\lambda_g$       | 306.4    | nm                             |
| Count median Stokes diameter (ELPI) | $d_{CMD}$         | 505      | nm                             |
| Cunningham slip factor              | $C_c(p, d_{CMD})$ | 2.75     | -                              |
| Inlet flow rate $q_1$ @1atm         | $q_1$             | 0.78     | $\text{L}\cdot\text{min}^{-1}$ |
| Inlet flow rate $q_2$ @1atm         | $q_2$             | 2.26     | $\text{L}\cdot\text{min}^{-1}$ |
| Inlet flow rate $q_3$ @1atm         | $q_3$             | 8.86     | $\text{L}\cdot\text{min}^{-1}$ |
| Jet flow rate $Q_1$                 | $Q_1$             | 3.55     | $\text{L}\cdot\text{min}^{-1}$ |
| Jet flow rate $Q_2$                 | $Q_2$             | 10.27    | $\text{L}\cdot\text{min}^{-1}$ |
| Jet flow rate $Q_3$                 | $Q_3$             | 40.27    | $\text{L}\cdot\text{min}^{-1}$ |
| Cutoff diameter @ inlet flow $q_1$  | $d_{50,1}$        | 1280     | nm                             |
| Cutoff diameter @ inlet flow $q_2$  | $d_{50,2}$        | 750      | nm                             |
| Cutoff diameter @ inlet flow $q_3$  | $d_{50,3}$        | 379      | nm                             |

## Reference

Fuchs, N. A. and Davies, C. N.: The mechanics of aerosols, Rev. and enl. ed., Dover Publications, New York , 1989.

Hinds, W. C.: Aerosol technology: properties, behavior, and measurement of airborne particles, 2nd ed., Wiley, New York, 1999.

Rader, D. J.: Momentum slip correction factor for small particles in nine common gases, Journal of Aerosol Science, 21, 161–168, [https://doi.org/10.1016/0021-8502\(90\)90001-E](https://doi.org/10.1016/0021-8502(90)90001-E), 1990.
